# Supplementary material for: PROPDESC-Score-Validierung (PROPDESC-Val)
Source: Springer Nature journal article supplement (doi:10.1007/s00101-023-01371-4), 2024-01-01
Supplement: MOESM1 [file 26588236]

**Ergänzung zum Artikel „PRä-Operative Vorhersage des postoperativen DELiriums durch geeignetes SCreening“ (PROPDESC) Score-VALidierung (PROPDESC-Val)** von Guttenthaler V, Kunsorg A, Mayr A et al. (2023) in *Die Anaesthesiologie*.

Beitrag und Zusatzmaterial stehen Ihnen auf [www.springermedizin.de](http://www.springermedizin.de) zur Verfügung. Bitte geben Sie dort den Beitragstitel in die Suche ein.

## **Vollständige Liste aller an PROPDESC-Val beteiligten Studienzentren mit Projektleiter in alphabetischer Reihenfolge:**

### 1. Aachen

**Dr. med. Julia Wallqvist**

**Dr. med. Linda Grüßer**

**Dr. med. Sebastian Ziemann**

Klinik für Anästhesiologie

Universitätsklinikum Aachen

Pauwelsstraße 30

52074 Aachen

### 2. Bad Honnef

**PD Dr. med. Stefan Wirz**

**Nadine Laabs**

Chefarzt der Abteilung für Anästhesie, Interdisziplinäre Intensivmedizin,

Schmerzmedizin/Palliativmedizin – Zentrum für Schmerzmedizin, Weaningzentrum

Cura Krankenhaus

Schülgenstr. 15

53604 Bad Honnef

### 3. Berlin

**Univ.-Prof. Dr. med. Sascha Treskatsch**

**Dr. med. Lennart Junge**

**Phillipp Brandhorst**

**Nicole Vogel**

Klinikdirektor

Charité - Universitätsmedizin Berlin

Klinik für Anästhesiologie m. S. operative Intensivmedizin

Charité Campus Benjamin Franklin

Hindenburgdamm 30

12203 Berlin

### 4. Bonn

**Prof. Dr. med. Maria Wittmann**

**Dr. med. Gregor Massoth**

**Alma Puskarevic**

**Vera Guttenthaler**

**Alexa Zimmermann**

**Vesna Vujic**

**Natalie Dahmen**

Klinik für Anästhesiologie und Operative Intensivmedizin

Universitätsklinikum Bonn

Venusberg-Campus 1

53127 Bonn

Tel.: +49 (0)228 287 14134

Maria.Wittmann@ukbonn.de

**Prof. Dr. med. Georg Baumgarten**

**Dr. med. Frank Hentschel**

Klinik für Anästhesiologie, Operative Intensivmedizin und Schmerzmedizin

Johanniter Krankenhaus Bonn

Akademische Lehrkrankenhäuser der Rheinischen Friedrich-Wilhelms-Universität Bonn

Johanniterstraße 3-5

53113 Bonn

#### 5. Dortmund

**Prof. Dr. med. Richard Ellerkmann**

**Dr. Karin Wenning**

**Antje Schüpphaus**

**Andrea Grebeldinger**

Klinikum Dortmund gGmbH

Beurhausstr. 40

44137 Dortmund

[www.klinikumdo.de](http://www.klinikumdo.de)

#### 6. Köln

**Prof. Dr. med. Stefan Weber**

**Martin Rößler**

Heilig Geist-Krankenhaus Köln

Graseggerstr. 105

50737 Köln

#### 7. Markgröningen

**PD Dr. med. Se-Chan Kim**

**Mauricio Franco**

Zentrum für Anästhesiologie, Perioperative Medizin und Schmerztherapie

Orthopädische Klinik Markgröningen

Kurt-Lindemann-Weg 10

71706 Markgröningen

#### 8. Mechernich

**Prof. Dr. med. Rudolf Hering**

## **Theresa Hering**

Klinik für Anästhesiologie, Intensivmedizin, Notfallmedizin und Schmerztherapie  
Kreiskrankenhaus Mechernich GmbH  
Akademisches Lehrkrankenhaus der Universität Bonn  
St.-Elisabeth-Str. 2-6  
53894 Mechernich

## 9. LMU München

**PD Dr. med. Thomas Saller**

**Dr. Anne-Maire Just**

**Dr. Margret Rudy**

**Mahmoud Almaghrabi**

**Daniel Rauschenbach**

Klinikum der Universität München

Klinik für Anästhesiologie

Marchioninistr. 15

81377 München

## 10. TU München

**PD Dr. med. Stefanie Pilge**

**Dr. med. Svenja Letz**

**Susanne Maluche**

**Linda Mitteregger**

**Wilfried Arnoldi**

**Pia Feddersen**

Klinik für Anästhesiologie und Intensivmedizin

Klinikum rechts der Isar

der Technischen Universität München

Ismaninger Str. 22

81675 München

## 11. Klinikum Straubing

**Prof. Dr. med. Matthias Jacob**

**Samuel Willkomm**

Klinik für Anästhesiologie, Operative Intensivmedizin und Schmerzmedizin

BARMHERZIGE BRÜDER

Klinikum St. Elisabeth Straubing GmbH

St.-Elisabeth-Str. 23

94315 Straubing

## 12. Würzburg

**Dr. med. Dr. rer. nat. Benedikt Schmid**

**Tri Dinh**

**Prof. Dr. med. Patrick Meybohm**

Klinik und Poliklinik für Anästhesiologie, Intensivmedizin, Notfallmedizin und  
Schmerztherapie  
Universitätsklinikum Würzburg  
Oberdürrbacher Str. 6  
97078 Würzburg
